# Supplementary material
Source: HighWire-hosted journal article supplement (https://jnm.snmjournals.org/highwire/filestream/94352/field_highwire_adjunct_files/0/111310_Supplemental_Data.pdf)
Supplement: 111310_Supplemental_Data.pdf [file 111310_Supplemental_Data.pdf]

## SUPPLEMENTAL DATA

### Phase 0 microdosing PET study using the human mini antibody F16SIP in head and neck cancer patients.

#### Description of Preparation of Clinical Grade $^{124}\text{I}$ -F16SIP

In short, after mixing of 150 MBq  $^{124}\text{I}$  with 66 ng (44 nmol) NaI in 0.3 mL 50 mM NaOH (iodine:F16SIP molar ratio = 1:10), this solution was added to a vial and preincubated with 14.1  $\mu\text{g}$  (80 nmol) ascorbic acid for 5 min. Hereafter, 200  $\mu\text{L}$  0.5M phosphate buffer, pH 7.1, 0.66 mg (8.3 nmol) F16SIP, and 565  $\mu\text{L}$  PBS were added to the vial followed by adding 35  $\mu\text{g}$  (81 nmol) freshly prepared iodogen in 35  $\mu\text{L}$  acetonitrile ( $t=0$ ). After 3 min, the reaction was stopped by adding an excess of ascorbic acid (2.5 mg, 14.1  $\mu\text{mol}$ ), and after 10 min purification was performed using PD10 size-exclusion chromatography (eluent: 5 mg/mL ascorbic acid in 0.9% NaCl (pH 5.0)). The mean labeling efficiency was  $84.8 \pm 3.3\%$ . Finally,  $^{124}\text{I}$ -F16SIP was formulated with native F16SIP and 5 mg/mL ascorbic acid in 0.9% NaCl and filter sterilized (total amount F16SIP to be administered was 2 mg in 20 mL). This procedure resulted in a sterile final product with endotoxin levels  $<2.5$  EU/mL. The radiochemical purity was always  $>97\%$  ( $98.9 \pm 0.7\%$ ). HPLC analysis revealed optimal integrity of the antibody. After each preparation of  $^{124}\text{I}$ -F16SIP, the immunoreactivity was determined by measuring binding to a serial dilution of A1-tensascin C-coated Sepharose resin essentially as described previously (1). Following this, the immunoreactive fraction of the  $^{124}\text{I}$ -F16SIP preparations was  $89.5 \pm 2.3\%$  at the highest resin concentration.

#### REFERENCE

1. Tijink BM, Perk LR, Budde M, Stigter-van Walsum M, Visser GWM, Kloet RW, et al.  $^{124}\text{I}$ -L19-SIP for immuno-PET imaging of tumor vasculature and guidance of  $^{131}\text{I}$ -L19-SIP radioimmunotherapy. *Eur J Nucl Med Mol Imaging*. 2009;36:1235-1244.
